# Supplementary material
Source: publisher figshare collection journal article supplement (https://karger.figshare.com/ndownloader/files/24690596)
Supplement: Supplementary file 1 [file 24690596]

**Supplementary table 1** Factors influencing patient satisfaction (univariate and multivariate analyses)

| Variable | Univariate analysis | | Multivariate analysis | |
| --- | --- | --- | --- | --- |
| Regression coefficient | p-value | Regression coefficient | p-value |
| Age (in years) | -0.13 | 0.074 | -0.10 | 0.234 |
| Smoking | 0.279 | 0.091 | 0.212 | 0.201 |
| Breast cancer | 0.246 | 0.164 | 0.069 | 0.727 |
| Precancerosis | 0.083 | 0.710 | 0.230 | 0.308 |
| Bilateral reconstruction | -0.154 | 0.407 | -0.210 | 0.312 |
| Follow-up time | -0.056 | **0.015** | -0.43 | 0.071 |
| Complications* | 0.260 | 0.156 | 0.181 | 0.331 |
| Secondary vs. primary reconstruction | -0.383 | **0.033** | -0.356 | 0.068 |
| Postoperative chemotherapy | 0.136 | 0.630 | 0.330 | 0.232 |

*Complications include loss of implant, any seroma, infection, rash and Baker grade III/IV capsular fibrosis
